# Supplementary material
Source: Springer Nature journal article supplement (https://www.springermedizin.de/resource/supplementary/12913_2014_3495_MOESM8_ESM.pdf/9532878)
Supplement: MOESM8 [file 9532878]

## Funnel Plot of Standard Error by Std diff in means

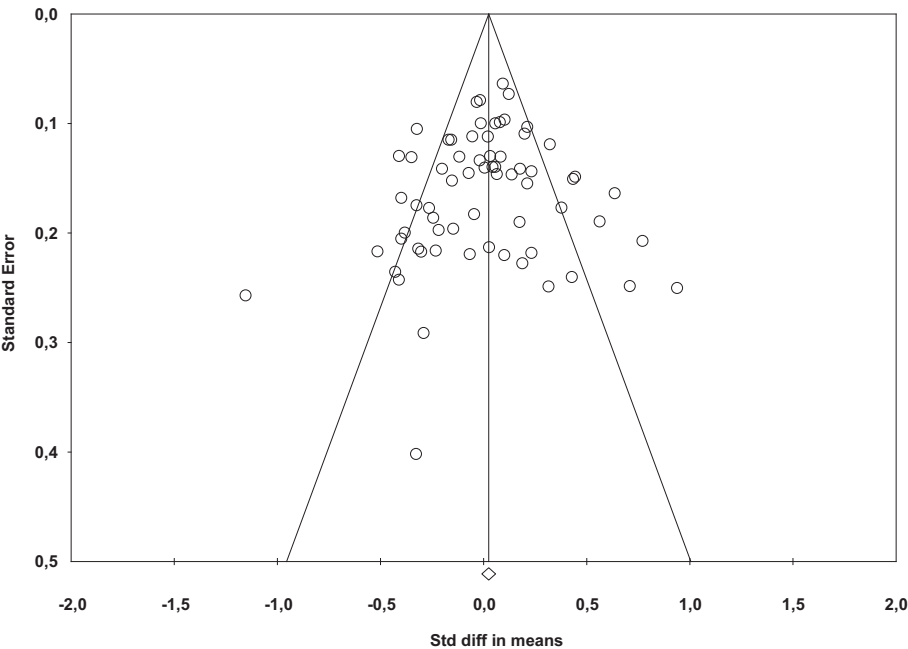

### Egger's regression intercept

|                            |          |
|----------------------------|----------|
| Intercept                  | -0,45808 |
| Standard error             | 0,62503  |
| 95% lower limit (2-tailed) | -1,70634 |
| 95% upper limit (2-tailed) | 0,79018  |
| t-value                    | 0,73290  |
| df                         | 65,00000 |
| P-value (1-tailed)         | 0,23313  |
| P-value (2-tailed)         | 0,46626  |
